# Supplementary material
Source: PubMed Central journal article supplement (PMC5280003)
Supplement: ASN.2015080879SupplementaryData.pdf [file ASN.2015080879SupplementaryData.pdf]

## Supplemental material

A: CICR (cumulative incidence competing risk) curves

B: Missing data analysis

C: Survival age analysis

D: Adjusted multivariate outcome regression models

E: Mortality of elderly transplanted patients from start of dialysis treatment and waitlisted for first transplantation compared with waitlisted elderly patients remaining on dialysis treatment

## A: CICR curves

For Stacked cumulative incidence figures

| Number at risk at year    | 0    | 1    | 2    | 3    | 4   | 5   |
|---------------------------|------|------|------|------|-----|-----|
| Young(d)/Young(r) DBD     | 1717 | 1437 | 1227 | 1051 | 944 | 909 |
| Young(d)/Young(r) DCD     | 1146 | 918  | 764  | 670  | 595 | 562 |
| Young(d)/Elderly(r) DBD   | 187  | 144  | 116  | 101  | 87  | 81  |
| Young(d)/Elderly(r) DCD   | 143  | 104  | 84   | 76   | 65  | 59  |
| Elderly(d)/Elderly(r) DBD | 245  | 176  | 126  | 94   | 72  | 62  |
| Elderly(d)/Elderly(r) DCD | 137  | 94   | 73   | 55   | 39  | 33  |

### Elderly(d)/Elderly(r) DCD

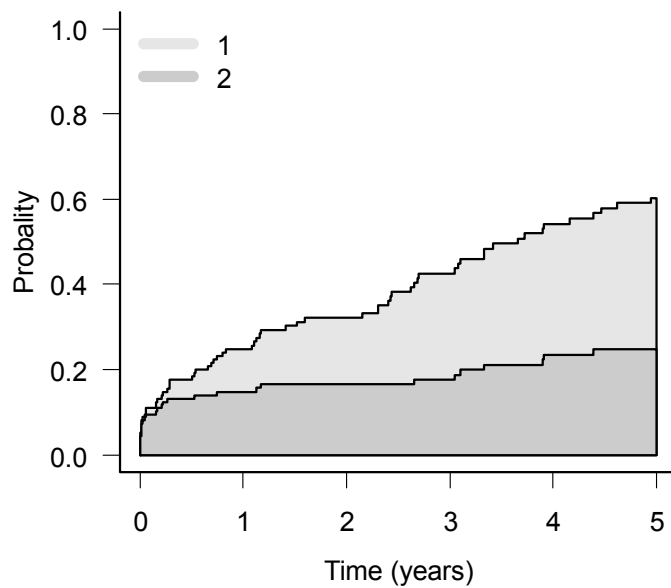

### Elderly(d)/Elderly(r) DBD

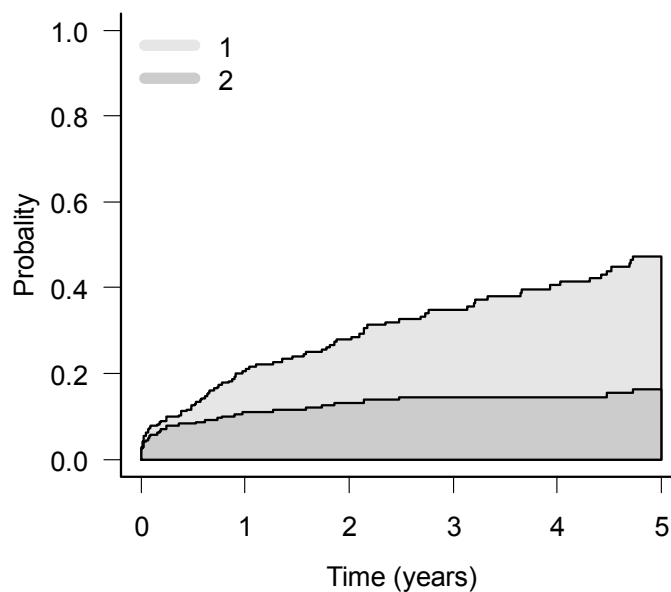

### Young(d)/Elderly(r) DCD

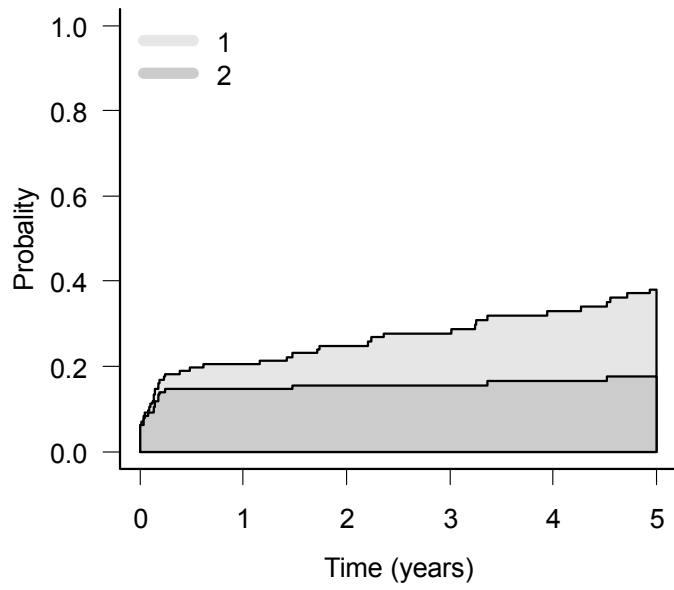

### Young(d)/Elderly(r) DBD

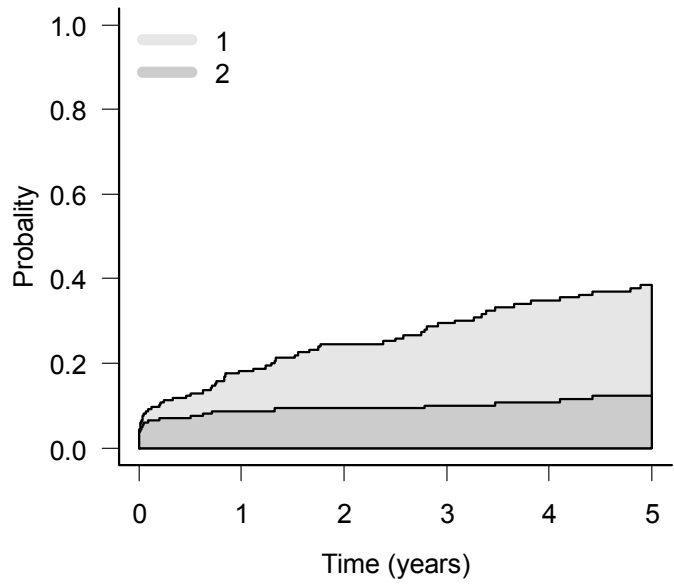

### Young(d)/Young(r) DCD

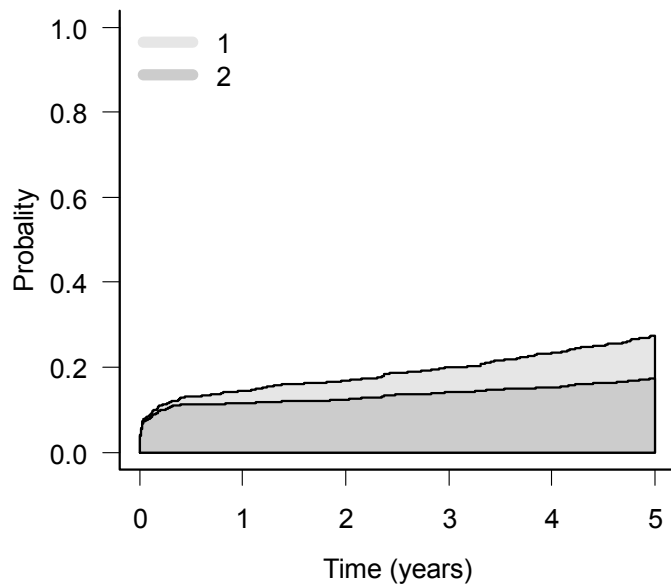

### Young(d)/Young(r) DBD

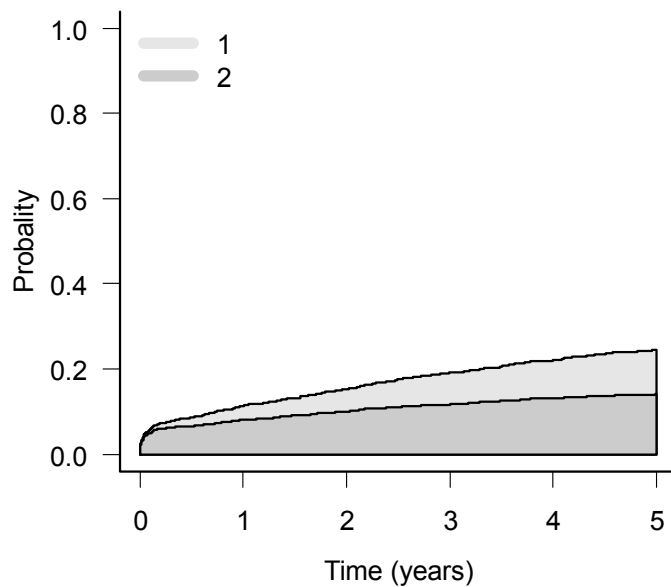

**Figure.** Stacked cumulative incidence (%) as the first event to occur for loss of a graft (event 2) or patient death (event 1). Percentages of both events are presented in table 2 in the article with 95% confidence intervals. d = donor; r = recipient; young = < 65 years; elderly =  $\geq$  65 years.

## B: Missing data analysis

We compared missing data patterns across the following confounders in the registry database: donor sex, recipient sex, donor hypotensive period, donor terminal MDRD, donor smoking, cold ischemia time, HLA mismatch levels A, HLA mismatch levels B, HLA mismatch levels DR, recipient original disease, and recipient dialysis vintage. Missing data of each confounder was < 10%. We assumed the pattern of missing data at random; we found > 40 different missing patterns across confounders.

Results after imputation of missing data were compared with complete-case-analysis. All missing values of confounders were imputed by using the Multivariate Imputation by Chained Equations (MICE) algorithm, with logistic regression for categorical variables and linear regression for continuous variables. Each missing variable in MICE is treated as an outcome, and missing data are predicted from the remaining variables, incorporating a random element to allow for the uncertainty in this variable's true value.<sup>20</sup> We created 10 imputed datasets and pooled the regression results to take different imputed values into account. We included multivariate outcomes of transplantation—primary non-function, delayed graft function, and acute rejection within 3 months—as well as renal function after 3 months and 1 year to the model. The role of each variable in the imputation model is summarized in table 1, and the results in table 2.

Table 1  
*Imputation of variables*

| Variable                                                | Missing (%) | Role imputation |           | Constraints |         |
|---------------------------------------------------------|-------------|-----------------|-----------|-------------|---------|
|                                                         |             | Dependent       | Predictor | Minimum     | Maximum |
| Donor sex                                               | 0%          | No              | Yes       |             |         |
| Recipient sex                                           | 0%          | No              | Yes       |             |         |
| Donor hypotensive period                                | 0%          | No              | Yes       |             |         |
| Last measured MDRD Donor                                | 1.5%        | Yes             | Yes       | 15          | 200     |
| Donor smoking                                           | 6.1%        | Yes             | Yes       |             |         |
| Cold ischemia time (hours)                              | 8.4%        | Yes             | Yes       | 5           | 35      |
| HLA mismatch levels A                                   | 5.3%        | Yes             | Yes       |             |         |
| HLA mismatch levels B                                   | 5.3%        | Yes             | Yes       |             |         |
| HLA mismatch levels DR                                  | 5.7%        | Yes             | Yes       |             |         |
| Recipient original disease                              | 0%          | No              | Yes       |             |         |
| Recipient Dialysis Vintage                              | 6.3%        | Yes             | Yes       | 0           | 25      |
| Primary non-function                                    | 0.6%        | No              | Yes       |             |         |
| Delayed graft function                                  | 4.0%        | No              | Yes       |             |         |
| Acute rejection <3 months                               | 1.6%        | No              | Yes       |             |         |
| eGFR 3 months                                           | 16.1%       | No              | Yes       |             |         |
| eGFR 1 year                                             | 26.6%       | No              | Yes       |             |         |
| Event (graft loss or patient death after 5 years)       | 0.6%        | No              | Yes       |             |         |
| Recipient and donor age groups, stratified by donortype | 0%          | No              | Yes       |             |         |

Table 2

*Imputed dataset: Comparison of transplant outcomes*

|                                                  | Recipients < 65 years |                     | Recipients ≥ 65 years |                     |                       |                       |
|--------------------------------------------------|-----------------------|---------------------|-----------------------|---------------------|-----------------------|-----------------------|
|                                                  | Young Donor (< 65y)   | Young Donor (< 65y) | Young Donor (< 65y)   | Young Donor (< 65y) | Elderly Donor (≥ 65y) | Elderly Donor (≥ 65y) |
|                                                  | DBD                   | DCD                 | DBD                   | DCD                 | DBD                   | DCD                   |
| Primary non-function <sup>A</sup>                | 0.64 (0.36-1.14)      | 1.18 (0.67-2.08)    | 1 (Ref)               | 1.24 (0.58-2.67)    | 0.70 (0.33-1.48)      | 1.62 (0.78-3.38)      |
| - Adjusted Model                                 | 0.58 (0.32-1.03)      | 1.11 (0.62-1.98)    | 1 (Ref)               | 1.11 (0.51-2.41)    | 0.54 (0.24-1.22)      | 1.20 (0.53-2.71)      |
| Delayed graft-function <sup>B</sup>              | 1.17 (0.77-1.76)      | 7.83 (5.14-11.90)*  | 1 (Ref)               | 11.13 (6.41-19.34)* | 2.01 (1.22-3.29)*     | 13.92 (7.78-24.90)*   |
| - Adjusted Model                                 | 1.14 (0.74-1.75)      | 8.18 (5.30-12.63)*  | 1 (Ref)               | 11.68 (6.62-20.61)* | 2.43 (1.42-4.15)*     | 17.35 (9.21-32.96)*   |
| Acute rejection within 3 months <sup>C</sup>     | 1.95 (1.16-3.27)*     | 2.26 (1.34-3.81)*   | 1 (Ref)               | 1.02 (0.48-2.18)    | 1.53 (0.82-2.85)      | 3.20 (1.68-6.10)*     |
| - Adjusted Model                                 | 1.79 (1.06-3.02)*     | 2.11 (1.24-3.59)*   | 1 (Ref)               | 0.94 (0.44-2.02)    | 1.10 (0.57-2.11)      | 2.25 (1.14-4.45)*     |
| 1-year graft failure <sup>D</sup>                | 0.61 (0.42-0.88)*     | 0.80 (0.55-1.16)    | 1 (Ref)               | 1.20 (0.73-1.97)    | 1.12 (0.72-1.74)      | 1.42 (0.87-2.29)      |
| - Adjusted Model                                 | 0.59 (0.41-0.86)*     | 0.78 (0.53-1.14)    | 1 (Ref)               | 1.13 (0.68-1.86)    | 0.98 (0.61-1.59)      | 1.25 (0.74-2.11)      |
| 1-year death-censored graft failure <sup>D</sup> | 0.91 (0.54-1.53)      | 1.33 (0.79-2.23)    | 1 (Ref)               | 1.77 (0.92-3.39)    | 1.24 (0.66-2.31)      | 1.75 (0.91-3.38)      |
| - Adjusted Model                                 | 0.87 (0.51-1.46)      | 1.25 (0.74-2.11)    | 1 (Ref)               | 1.62 (0.84-3.12)    | 1.10 (0.57-2.15)      | 1.52 (0.75-3.09)      |
| 1-year mortality <sup>D</sup>                    | 0.48 (0.35-0.65)*     | 0.45 (0.33-0.63)*   | 1 (Ref)               | 1.01 (0.66-1.55)    | 1.29 (0.91-1.84)      | 1.50 (1.01-2.21)*     |
| - Adjusted Model                                 | 0.48 (0.35-0.66)*     | 0.48 (0.35-0.67)*   | 1 (Ref)               | 1.05 (0.69-1.62)    | 1.29 (0.88-1.90)      | 1.71 (1.11-2.64)*     |
| 5-year graft failure <sup>D</sup>                | 0.67 (0.45-0.77)*     | 0.68 (0.52-0.90)*   | 1 (Ref)               | 1.03 (0.71-1.51)    | 1.22 (0.88-1.69)      | 1.69 (1.19-2.39)*     |
| - Adjusted Model                                 | 0.58 (0.44-0.76)*     | 0.69 (0.52-0.91)*   | 1 (Ref)               | 1.11 (0.71-1.73)    | 1.08 (0.70-1.66)      | 1.61 (1.02-2.55)*     |
| 5-year death-censored graft failure <sup>D</sup> | 1.05 (0.68-1.55)      | 1.36 (0.86-1.65)    | 1 (Ref)               | 1.55 (0.86-2.78)    | 1.35 (0.78-2.33)      | 2.09 (1.19-3.66)*     |
| - Adjusted Model                                 | 0.92 (0.55-1.55)      | 1.16 (0.69-1.95)    | 1 (Ref)               | 1.42 (0.79-2.56)    | 1.12 (0.63-2.00)      | 1.69 (0.93-3.09)      |
| 5-year mortality <sup>D</sup>                    | 0.46(0.33-0.62)*      | 0.44 (0.32-0.61)*   | 1 (Ref)               | 1.03 (0.68-1.58)    | 1.44 (1.01-2.04)*     | 1.64 (1.11-2.43)*     |
| - Adjusted Model                                 | 0.56 (0.37-0.83)*     | 0.54 (0.36-0.81)*   | 1 (Ref)               | 1.08 (0.71-1.66)    | 1.42 (0.96-2.09)      | 1.85 (1.20-2.86)*     |

*Note.* Presented are ORs (CI95%) or HRs (CI95%). Marked in green are ORs and HRs with similar significance, whereas marked in red show different ORs and HRs as compared to complete case analysis. <sup>A</sup> = Data available of 3572 patients. <sup>B</sup> = Data available of 3209 patients. <sup>C</sup> = Data available of 3539 patients. <sup>D</sup> = Data available of 3575 patients. In adjusted models, the following variables were taken into account: donor sex, recipient sex, donor hypotensive period, donor terminal MDRD, donor smoking, cold ischemia time, HLA mismatch A, HLA mismatch B, HLA mismatch Dr, recipient original disease, and recipient dialysis vintage. <sup>A,B,C</sup> = logistic regression analyses. <sup>D</sup> = Cox-regression analyses. ORs or HRs with \* indicate p < .05.

### Appendix C: Survival age analysis of elderly recipients

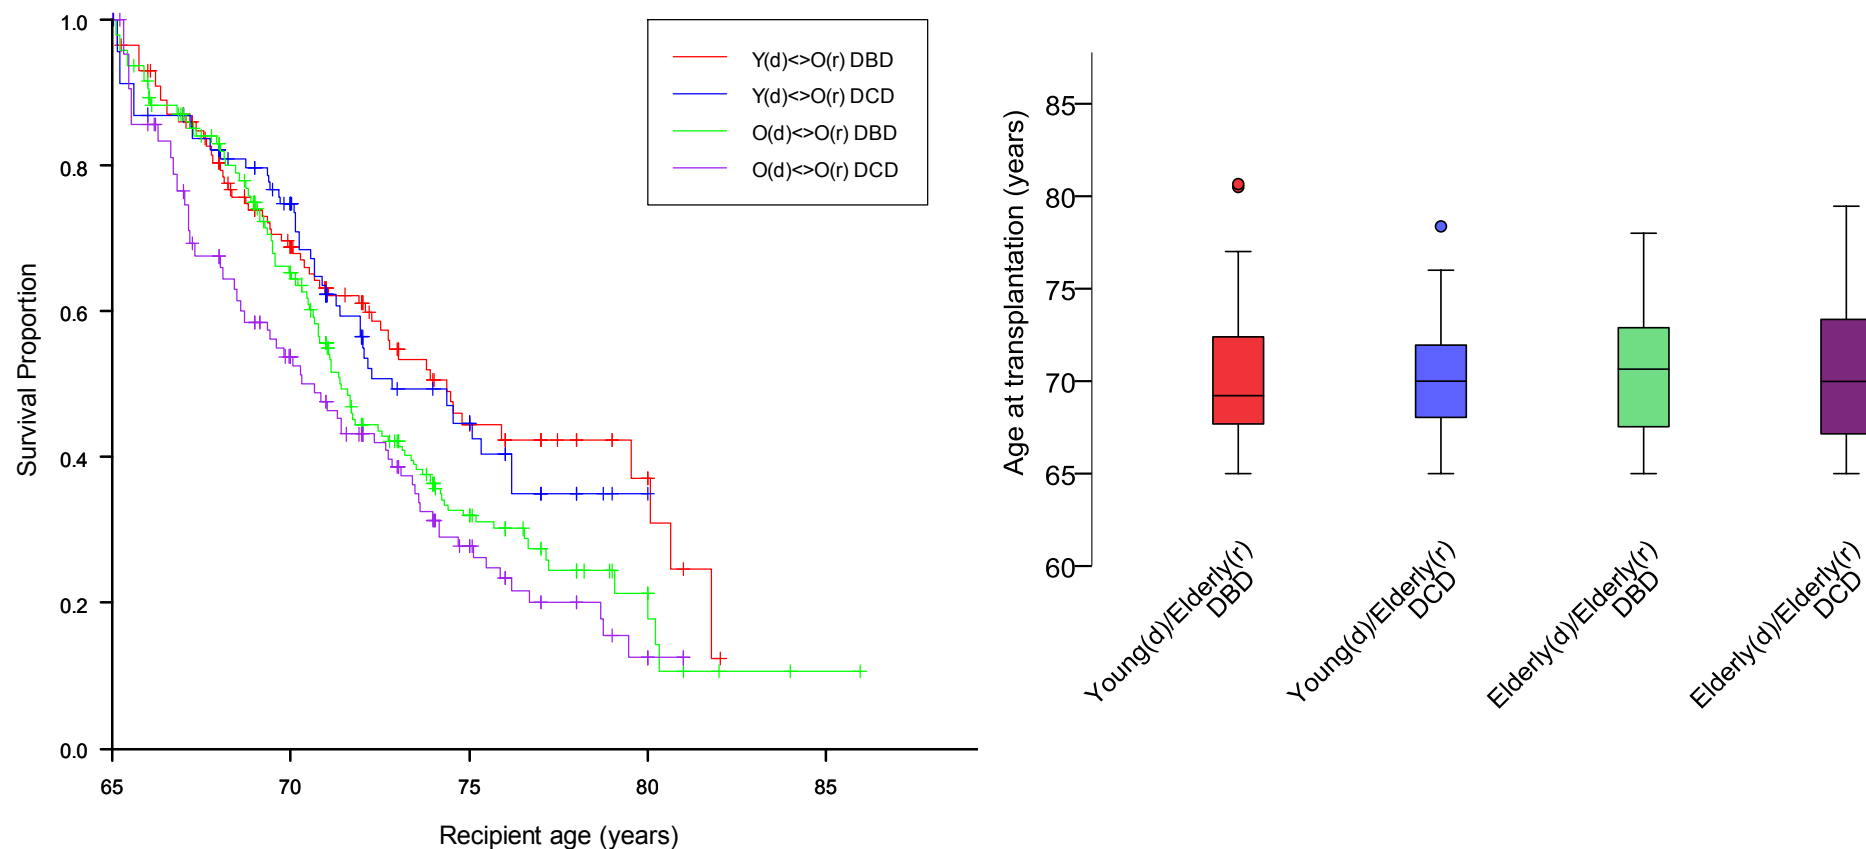

**Figure. Left-panel:** Left truncated Kaplan-Meier estimates of elderly recipient survival age. The five year patient median survival age was lowest in elderly recipients of elderly DCD kidneys with 70.7 years (CI 68.4 – 73.5). This was about 8 months higher among elderly with elderly DBD (71.4 years, CI 70.6 – 73.4), 2.1 years higher among elderly of young DCD kidneys (72.8 years, CI 71.3 – n.a.), and 3.7 years (74.7, CI 72.1 – 80.7) higher for elderly of young DBD kidneys. Results are unadjusted for confounders due to non-proportionality of the hazards over time. Y = young (<65y); d = donor; O=Old ( $\geq 65y$ ); r = recipient; DCD = Donation after circulatory death; DBD = Donation after brain death. **Right-panel:** Corresponding number at risk in boxplots for each category of patients who enter the study when transplanted at certain age.

Appendix D: Adjusted multivariate outcome regression models

| <b>5-Year graft survival</b>   | Hazard ratio | P-value | Wald Statistic | Degrees of freedom | Lower 95%CI | Upper 95%CI |
|--------------------------------|--------------|---------|----------------|--------------------|-------------|-------------|
| Recipient age groups           |              | 0.000   | 35.35          | 5                  |             |             |
| Young(d)/Elderly(r) DBD (ref)  | 1.0 (ref)    |         |                |                    |             |             |
| Young(d)/Elderly(r) DBD        | 1.03         | 0.891   | 0.02           | 1                  | 0.68        | 1.57        |
| Elderly(d)/Elderly(r) DBD      | 1.00         | 0.984   | 0.00           | 1                  | 0.67        | 1.49        |
| Elderly(d)/Elderly(r) DCD      | 1.49         | 0.066   | 3.39           | 1                  | 0.97        | 2.29        |
| Young(d)/Young(r) DBD          | 0.64         | 0.004   | 8.47           | 1                  | 0.47        | 0.86        |
| Young(d)/Young(r) DCD          | 0.71         | 0.031   | 4.63           | 1                  | 0.52        | 0.97        |
| Donor sex (male)               | 1.00         | 0.981   | 0.00           | 1                  | 0.86        | 1.16        |
| Recipient sex (male)           | 0.91         | 0.208   | 1.59           | 1                  | 0.78        | 1.06        |
| CIT categories                 |              | 0.042   | 8.20           | 3                  |             |             |
| CIT < 12 h                     | 1.0 (ref)    |         |                |                    |             |             |
| CIT ≥12h and <18h              | 1.17         | 0.237   | 1.40           | 1                  | 0.90        | 1.50        |
| CIT ≥18h and <24h              | 1.16         | 0.263   | 1.25           | 1                  | 0.89        | 1.51        |
| CIT ≥24h                       | 1.48         | 0.008   | 7.05           | 1                  | 1.11        | 1.99        |
| HLA-A                          |              | 0.216   | 3.07           | 2                  |             |             |
| HLA-A (0 mismatches)           | 0.85         | 0.195   | 1.68           | 1                  | 0.66        | 1.09        |
| HLA-A (1 mismatch)             | 0.82         | 0.080   | 3.07           | 1                  | 0.65        | 1.02        |
| HLA-A (2 mismatches)           | 1.0 (ref)    |         |                |                    |             |             |
| HLA-B                          |              | 0.012   | 8.88           | 2                  |             |             |
| HLA-B (0 mismatches)           | 0.70         | 0.004   | 8.27           | 1                  | 0.55        | 0.89        |
| HLA-B (1 mismatch)             | 0.80         | 0.021   | 5.30           | 1                  | 0.66        | 0.97        |
| HLA-B (2 mismatches)           | 1.0 (ref)    |         |                |                    |             |             |
| HLA-Dr                         |              | 0.790   | 0.47           | 2                  |             |             |
| HLA-Dr (0 mismatches)          | 0.96         | 0.784   | 0.08           | 1                  | 0.70        | 1.31        |
| HLA-Dr (1 mismatch)            | 1.01         | 0.923   | 0.01           | 1                  | 0.76        | 1.35        |
| HLA-Dr (2 mismatches)          | 1.0 (ref)    |         |                |                    |             |             |
| Donor hypotensive period (yes) | 0.92         | 0.311   | 1.02           | 1                  | 0.78        | 1.08        |
| Dialysis vintage (years)       | 1.04         | 0.006   | 7.51           | 1                  | 1.01        | 1.07        |



|                                          |           |       |       |   |      |      |
|------------------------------------------|-----------|-------|-------|---|------|------|
| Smoking (yes)                            | 1.21      | 0.010 | 6.59  | 1 | 1.05 | 1.41 |
| Terminal eGFR donor (MDRD)               | 1.00      | 0.000 | 13.03 | 1 | 0.99 | 1.00 |
| Recipient primary disease                |           | 0.000 | 24.83 | 6 |      |      |
| Polycystic kidney disease                | 1.0 (ref) |       |       | 6 |      |      |
| Glomerulonephritis                       | 1.02      | 0.903 | 0.01  | 1 | 0.78 | 1.32 |
| Renal vascular disease                   | 1.50      | 0.002 | 9.26  | 1 | 1.16 | 1.95 |
| Diabetes                                 | 1.49      | 0.008 | 7.12  | 1 | 1.11 | 2.00 |
| Chronic renal failure (etiology unknown) | 0.94      | 0.666 | 0.19  | 1 | 0.70 | 1.25 |
| Pyelonephritis                           | 1.04      | 0.828 | 0.05  | 1 | 0.73 | 1.47 |
| Other                                    | 1.18      | 0.272 | 1.21  | 1 | 0.88 | 1.59 |

| <b>5-Year death-censored graft failure</b> | Hazard ratio | P-value | Wald Statistic | Degrees of freedom | Lower 95%CI | Upper 95%CI |
|--------------------------------------------|--------------|---------|----------------|--------------------|-------------|-------------|
| Recipient age groups                       |              | 0.352   | 5.55           | 5                  |             |             |
| Young(d)/Elderly(r) DBD (ref)              | 1.0 (ref)    |         |                |                    | 0.70        | 2.67        |
| Young(d)/Elderly(r) DBD                    | 1.37         | 0.359   | 0.84           | 1                  | 0.53        | 2.00        |
| Elderly(d)/Elderly(r) DBD                  | 1.03         | 0.920   | 0.01           | 1                  | 0.79        | 3.11        |
| Elderly(d)/Elderly(r) DCD                  | 1.57         | 0.200   | 1.64           | 1                  | 0.68        | 1.91        |
| Young(d)/Young(r) DBD                      | 1.14         | 0.618   | 0.25           | 1                  | 0.82        | 2.32        |
| Young(d)/Young(r) DCD                      | 1.38         | 0.228   | 1.46           | 1                  | 0.78        | 1.17        |
| Donor sex (male)                           | 0.96         | 0.652   | 0.20           | 1                  | 0.78        | 1.17        |
| Recipient sex (male)                       | 0.96         | 0.661   | 0.19           | 1                  | 0.78        | 1.17        |
| CIT categories                             |              | 0.000   | 24.35          | 3                  |             |             |
| CIT < 12 h                                 | 1.0 (ref)    |         |                |                    |             |             |
| CIT ≥12h and <18h                          | 1.60         | 0.024   | 5.13           | 1                  | 1.07        | 2.40        |
| CIT ≥18h and <24h                          | 1.78         | 0.006   | 7.43           | 1                  | 1.17        | 2.68        |
| CIT ≥24h                                   | 2.67         | 0.000   | 19.86          | 1                  | 1.73        | 4.12        |
| HLA-A                                      |              | 0.062   | 5.55           | 2                  |             |             |
| HLA-A (0 mismatches)                       | 0.71         | 0.040   | 4.21           | 1                  | 0.51        | 0.98        |
| HLA-A (1 mismatch)                         | 0.71         | 0.022   | 5.26           | 1                  | 0.52        | 0.95        |
| HLA-A (2 mismatches)                       | 1.0 (ref)    |         |                |                    |             |             |
| HLA-B                                      |              | 0.015   | 8.38           | 2                  |             |             |
| HLA-B (0 mismatches)                       | 0.67         | 0.015   | 5.97           | 1                  | 0.49        | 0.92        |

|                                          |           |       |       |   |      |      |
|------------------------------------------|-----------|-------|-------|---|------|------|
| HLA-B (1 mismatch)                       | 0.70      | 0.007 | 7.19  | 1 | 0.55 | 0.91 |
| HLA-B (2 mismatches)                     | 1.0 (ref) |       |       |   |      |      |
| HLA-Dr                                   |           | 0.284 | 2.52  | 2 |      |      |
| HLA-Dr (0 mismatches)                    | 0.79      | 0.297 | 1.09  | 1 | 0.51 | 1.23 |
| HLA-Dr (1 mismatch)                      | 0.93      | 0.750 | 0.10  | 1 | 0.62 | 1.42 |
| HLA-Dr (2 mismatches)                    | 1.0 (ref) |       |       |   |      |      |
| Donor hypotensive period (yes)           | 1.00      | 0.980 | 0.00  | 1 | 0.80 | 1.24 |
| Dialysis vintage (years)                 | 1.03      | 0.134 | 2.24  | 1 | 0.99 | 1.07 |
| Smoking (yes)                            | 1.20      | 0.073 | 3.20  | 1 | 0.98 | 1.46 |
| Terminal eGFR donor (MDRD)               | 1.00      | 0.000 | 12.27 | 1 | 0.99 | 1.00 |
| Recipient primary disease                |           | 0.379 | 6.41  | 6 |      |      |
| Polycystic kidney disease                | 1.0 (ref) |       |       |   |      |      |
| Glomerulonephritis                       | 0.77      | 0.166 | 1.92  | 1 | 0.53 | 1.12 |
| Renal vascular disease                   | 0.87      | 0.417 | 0.66  | 1 | 0.63 | 1.21 |
| Diabetes                                 | 0.96      | 0.830 | 0.05  | 1 | 0.68 | 1.36 |
| Chronic renal failure (etiology unknown) | 0.70      | 0.114 | 2.50  | 1 | 0.46 | 1.09 |
| Pyelonephritis                           | 0.72      | 0.081 | 3.04  | 1 | 0.50 | 1.04 |
| Other                                    | 0.75      | 0.205 | 1.61  | 1 | 0.47 | 1.17 |

| <b>5-Year mortality</b>       | Hazard ratio | P-value | Wald Statistic | Degrees of freedom | Lower 95%CI | Upper 95%CI |
|-------------------------------|--------------|---------|----------------|--------------------|-------------|-------------|
| Recipient age groups          |              | .000    | 81.57          | 5                  |             |             |
| Young(d)/Elderly(r) DBD (ref) | 1.0 (ref)    |         |                |                    |             |             |
| Young(d)/Elderly(r) DBD       | 1.15         | .553    | 0.35           | 1                  | 0.72        | 1.82        |
| Elderly(d)/Elderly(r) DBD     | 1.35         | .186    | 1.75           | 1                  | 0.87        | 2.09        |
| Elderly(d)/Elderly(r) DCD     | 1.86         | .012    | 6.33           | 1                  | 1.15        | 3.02        |
| Young(d)/Young(r) DBD         | 0.49         | .000    | 15.58          | 1                  | 0.35        | 0.70        |
| Young(d)/Young(r) DCD         | 0.48         | .000    | 15.28          | 1                  | 0.33        | 0.69        |
| Donor sex (male)              | 1.13         | .193    | 1.69           | 1                  | 0.94        | 1.35        |
| Recipient sex (male)          | 0.93         | .431    | 0.62           | 1                  | 0.77        | 1.12        |
| CIT categories                |              | .832    | 0.87           | 3                  |             |             |
| CIT < 12 h                    | 1.0 (ref)    |         |                |                    |             |             |

|                                          |           |      |       |   |      |      |
|------------------------------------------|-----------|------|-------|---|------|------|
| CIT ≥12h and <18h                        | 0.97      | .833 | 0.04  | 1 | 0.73 | 1.28 |
| CIT ≥18h and <24h                        | 0.89      | .434 | 0.61  | 1 | 0.66 | 1.19 |
| CIT ≥24h                                 | 0.95      | .771 | 0.08  | 1 | 0.67 | 1.35 |
| HLA-A                                    |           | .642 | 0.89  | 2 |      |      |
| HLA-A (0 mismatches)                     | 1.16      | .370 | 0.80  | 1 | 0.84 | 1.58 |
| HLA-A (1 mismatch)                       | 1.07      | .628 | 0.23  | 1 | 0.81 | 1.42 |
| HLA-A (2 mismatches)                     | 1.0 (ref) |      |       |   |      |      |
| HLA-B                                    |           | .127 | 4.13  | 2 |      |      |
| HLA-B (0 mismatches)                     | 0.74      | .048 | 3.92  | 1 | 0.55 | 1.00 |
| HLA-B (1 mismatch)                       | 0.84      | .139 | 2.19  | 1 | 0.67 | 1.06 |
| HLA-B (2 mismatches)                     | 1.0 (ref) |      |       |   |      |      |
| HLA-Dr                                   |           | .956 | 0.09  | 2 |      |      |
| HLA-Dr (0 mismatches)                    | 1.05      | .775 | 0.08  | 1 | 0.73 | 1.51 |
| HLA-Dr (1 mismatch)                      | 1.03      | .857 | 0.03  | 1 | 0.74 | 1.43 |
| HLA-Dr (2 mismatches)                    | 1.0 (ref) |      |       |   |      |      |
| Donor hypotensive period (yes)           | 0.91      | .342 | 0.90  | 1 | 0.74 | 1.11 |
| Dialysis vintage (years)                 | 1.08      | .000 | 18.70 | 1 | 1.04 | 1.12 |
| Smoking (yes)                            | 1.40      | .000 | 13.06 | 1 | 1.17 | 1.68 |
| Terminal eGFR donor (MDRD)               | 1.00      | .148 | 2.09  | 1 | 1.00 | 1.00 |
| Recipient primary disease                |           | .000 | 38.04 | 6 |      |      |
| Polycystic kidney disease                | 1.0 (ref) |      |       |   |      |      |
| Glomerulonephritis                       | 0.88      | .440 | 0.60  | 1 | 0.63 | 1.23 |
| Renal vascular disease                   | 1.61      | .003 | 8.66  | 1 | 1.17 | 2.21 |
| Diabetes                                 | 1.87      | .000 | 12.61 | 1 | 1.32 | 2.64 |
| Chronic renal failure (etiology unknown) | 0.93      | .700 | 0.15  | 1 | 0.65 | 1.33 |
| Pyelonephritis                           | 0.97      | .887 | 0.02  | 1 | 0.62 | 1.51 |
| Other                                    | 1.14      | .489 | 0.48  | 1 | 0.79 | 1.65 |

| Primary non-function          | Odds ratio | P-value | Wald Statistic | Degrees of freedom | Lower 95%CI | Upper 95%CI |
|-------------------------------|------------|---------|----------------|--------------------|-------------|-------------|
| Recipient age groups          |            | .001    | 20.43          | 5                  |             |             |
| Young(d)/Elderly(r) DBD (ref) | 1.0 (ref)  |         |                |                    |             |             |
| Young(d)/Elderly(r) DBD       | .98        | .972    | 0.00           | 1                  | 0.38        | 2.54        |

|                                          |           |      |       |   |      |      |
|------------------------------------------|-----------|------|-------|---|------|------|
| Elderly(d)/Elderly(r) DBD                | .48       | .143 | 2.14  | 1 | 0.18 | 1.28 |
| Elderly(d)/Elderly(r) DCD                | 1.18      | .735 | 0.11  | 1 | 0.45 | 3.06 |
| Young(d)/Young(r) DBD                    | .61       | .165 | 1.93  | 1 | 0.30 | 1.23 |
| Young(d)/Young(r) DCD                    | 1.28      | .490 | 0.48  | 1 | 0.64 | 2.56 |
| Donor sex (male)                         | 1.02      | .890 | 0.02  | 1 | 0.75 | 1.39 |
| Recipient sex (male)                     | 1.03      | .837 | 0.04  | 1 | 0.76 | 1.41 |
| CIT categories                           |           | .010 | 11.37 | 3 |      |      |
| CIT < 12 h                               | 1.0 (ref) |      |       |   |      |      |
| CIT ≥12h and <18h                        | 1.17      | .587 | 0.30  | 1 | 0.67 | 2.03 |
| CIT ≥18h and <24h                        | 1.34      | .307 | 1.04  | 1 | 0.76 | 2.37 |
| CIT ≥24h                                 | 2.25      | .008 | 7.01  | 1 | 1.24 | 4.11 |
| HLA-A                                    |           | .421 | 1.73  | 2 |      |      |
| HLA-A (0 mismatches)                     | .78       | .347 | 0.89  | 1 | 0.47 | 1.30 |
| HLA-A (1 mismatch)                       | .73       | .189 | 1.73  | 1 | 0.46 | 1.17 |
| HLA-A (2 mismatches)                     | 1.0 (ref) |      |       |   |      |      |
| HLA-B                                    |           | .005 | 10.66 | 2 |      |      |
| HLA-B (0 mismatches)                     | .41       | .001 | 10.66 | 1 | 0.24 | 0.70 |
| HLA-B (1 mismatch)                       | .71       | .079 | 3.09  | 1 | 0.48 | 1.04 |
| HLA-B (2 mismatches)                     | 1.0 (ref) |      |       |   |      |      |
| HLA-Dr                                   |           | .724 | 0.65  | 2 |      |      |
| HLA-Dr (0 mismatches)                    | .76       | .424 | .64   | 1 | .39  | 1.49 |
| HLA-Dr (1 mismatch)                      | .79       | .461 | .54   | 1 | .42  | 1.48 |
| HLA-Dr (2 mismatches)                    | 1.0 (ref) |      |       |   |      |      |
| Donor hypotensive period (yes)           | .93       | .697 | .15   | 1 | .66  | 1.33 |
| Dialysis vintage (years)                 | 1.00      | .922 | .01   | 1 | .94  | 1.06 |
| Smoking (yes)                            | 1.34      | .065 | 3.41  | 1 | .98  | 1.82 |
| Terminal eGFR donor (MDRD)               | .99       | .016 | 5.81  | 1 | .99  | 1.00 |
| Recipient primary disease                |           | .384 | 6.36  | 6 |      |      |
| Polycystic kidney disease                | 1.0 (ref) |      |       |   |      |      |
| Glomerulonephritis                       | 1.01      | .972 | .00   | 1 | .62  | 1.65 |
| Renal vascular disease                   | .95       | .842 | .04   | 1 | .55  | 1.62 |
| Diabetes                                 | .86       | .627 | .24   | 1 | .47  | 1.59 |
| Chronic renal failure (etiology unknown) | .61       | .102 | 2.67  | 1 | .34  | 1.10 |
| Pyelonephritis                           | .60       | .198 | 1.65  | 1 | .28  | 1.31 |
| Other                                    | 1.12      | .680 | .17   | 1 | .65  | 1.96 |

|           |     |      |      |   |  |  |
|-----------|-----|------|------|---|--|--|
| Intercept | .21 | .017 | 5.74 | 1 |  |  |
|-----------|-----|------|------|---|--|--|

| <b>Delayed graft function</b>  | Odds ratio | P-value | Wald Statistic | Degrees of freedom | Lower 95%CI | Upper 95%CI |
|--------------------------------|------------|---------|----------------|--------------------|-------------|-------------|
| Recipient age groups           |            | .000    | 422.24         | 5                  |             |             |
| Young(d)/Elderly(r) DBD (ref)  | 1.0 (ref)  |         |                |                    |             |             |
| Young(d)/Elderly(r) DBD        | 10.43      | .000    | 59.69          | 1                  | 5.75        | 18.91       |
| Elderly(d)/Elderly(r) DBD      | 1.84       | .037    | 4.36           | 1                  | 1.04        | 3.26        |
| Elderly(d)/Elderly(r) DCD      | 14.87      | .000    | 59.04          | 1                  | 7.47        | 29.61       |
| Young(d)/Young(r) DBD          | 1.08       | .742    | 0.11           | 1                  | 0.69        | 1.69        |
| Young(d)/Young(r) DCD          | 7.09       | .000    | 71.53          | 1                  | 4.50        | 11.17       |
| Donor sex (male)               | 0.77       | .004    | 8.31           | 1                  | 0.64        | 0.92        |
| Recipient sex (male)           | 0.91       | .312    | 1.02           | 1                  | 0.76        | 1.09        |
| CIT categories                 |            | .000    | 27.43          | 3                  |             |             |
| CIT < 12 h                     | 1.0 (ref)  |         |                |                    |             |             |
| CIT ≥12h and <18h              | 1.35       | .050    | 3.85           | 1                  | 1.00        | 1.81        |
| CIT ≥18h and <24h              | 1.77       | .000    | 13.29          | 1                  | 1.30        | 2.41        |
| CIT ≥24h                       | 2.30       | .000    | 20.82          | 1                  | 1.61        | 3.28        |
| HLA-A                          |            | .460    | 1.55           | 2                  |             |             |
| HLA-A (0 mismatches)           | 1.02       | .905    | 0.01           | 1                  | 0.74        | 1.41        |
| HLA-A (1 mismatch)             | 1.14       | .400    | 0.71           | 1                  | 0.84        | 1.54        |
| HLA-A (2 mismatches)           | 1.0 (ref)  |         |                |                    |             |             |
| HLA-B                          |            | .747    | 0.58           | 2                  |             |             |
| HLA-B (0 mismatches)           | 0.91       | .552    | 0.35           | 1                  | 0.68        | 1.23        |
| HLA-B (1 mismatch)             | 1.00       | .987    | 0.00           | 1                  | 0.78        | 1.27        |
| HLA-B (2 mismatches)           | 1.0 (ref)  |         |                |                    |             |             |
| HLA-Dr                         |            | .173    | 3.51           | 2                  |             |             |
| HLA-Dr (0 mismatches)          | 1.05       | .824    | 0.05           | 1                  | 0.68        | 1.62        |
| HLA-Dr (1 mismatch)            | 1.24       | .304    | 1.06           | 1                  | 0.82        | 1.87        |
| HLA-Dr (2 mismatches)          | 1.0 (ref)  |         |                |                    |             |             |
| Donor hypotensive period (yes) | 0.84       | .097    | 2.75           | 1                  | 0.69        | 1.03        |
| Dialysis vintage (years)       | 1.06       | .001    | 11.78          | 1                  | 1.03        | 1.10        |
| Smoking (yes)                  | 1.11       | .253    | 1.31           | 1                  | 0.93        | 1.33        |

|                                          |           |      |       |   |      |      |
|------------------------------------------|-----------|------|-------|---|------|------|
| Terminal eGFR donor (MDRD)               | 0.99      | .000 | 28.18 | 1 | 0.99 | 1.00 |
| Recipient primary disease                |           | .164 | 9.17  | 6 |      |      |
| Polycystic kidney disease                | 1.0 (ref) |      |       |   |      |      |
| Glomerulonephritis                       | 1.07      | .652 | 0.20  | 1 | 0.80 | 1.44 |
| Renal vascular disease                   | 1.11      | .501 | 0.45  | 1 | 0.81 | 1.53 |
| Diabetes                                 | 1.61      | .010 | 6.65  | 1 | 1.12 | 2.31 |
| Chronic renal failure (etiology unknown) | 1.11      | .510 | 0.43  | 1 | 0.81 | 1.54 |
| Pyelonephritis                           | 1.09      | .669 | 0.18  | 1 | 0.73 | 1.62 |
| Other                                    | 0.94      | .742 | 0.11  | 1 | 0.67 | 1.33 |
| Intercept                                | 0.19      | .000 | 16.31 | 1 |      |      |

| <b>Acute rejection &lt; 3 months</b> | Odds ratio | P-value | Wald Statistic | Degrees of freedom | Lower 95%CI | Upper 95%CI |
|--------------------------------------|------------|---------|----------------|--------------------|-------------|-------------|
| Recipient age groups                 |            | .002    | 18.67          | 5                  |             |             |
| Young(d)/Elderly(r) DBD (ref)        | 1.0 (ref)  |         |                |                    |             |             |
| Young(d)/Elderly(r) DBD              | .80        | .575    | 0.31           | 1                  | 0.36        | 1.76        |
| Elderly(d)/Elderly(r) DBD            | 1.24       | .547    | 0.36           | 1                  | 0.62        | 2.46        |
| Elderly(d)/Elderly(r) DCD            | 2.78       | .005    | 7.72           | 1                  | 1.35        | 5.73        |
| Young(d)/Young(r) DBD                | 1.43       | .189    | 1.72           | 1                  | 0.84        | 2.44        |
| Young(d)/Young(r) DCD                | 1.79       | .035    | 4.46           | 1                  | 1.04        | 3.08        |
| Donor sex (male)                     | .96        | .721    | 0.13           | 1                  | 0.79        | 1.18        |
| Recipient sex (male)                 | .97        | .811    | 0.06           | 1                  | 0.79        | 1.20        |
| CIT categories                       |            | .490    | 2.42           | 3                  |             |             |
| CIT < 12 h                           | 1.0 (ref)  |         |                |                    |             |             |
| CIT ≥12h and <18h                    | 1.17       | .362    | 0.83           | 1                  | 0.83        | 1.65        |
| CIT ≥18h and <24h                    | 1.31       | .133    | 2.26           | 1                  | 0.92        | 1.86        |
| CIT ≥24h                             | 1.20       | .396    | 0.72           | 1                  | 0.79        | 1.80        |
| HLA-A                                |            | .526    | 1.28           | 2                  |             |             |
| HLA-A (0 mismatches)                 | .82        | .281    | 1.16           | 1                  | 0.57        | 1.18        |
| HLA-A (1 mismatch)                   | .90        | .534    | 0.39           | 1                  | 0.65        | 1.25        |
| HLA-A (2 mismatches)                 | 1.0 (ref)  |         |                |                    |             |             |
| HLA-B                                |            | .257    | 2.72           | 2                  |             |             |
| HLA-B (0 mismatches)                 | .76        | .102    | 2.67           | 1                  | 0.54        | 1.06        |

|                                          |           |      |       |   |      |      |
|------------------------------------------|-----------|------|-------|---|------|------|
| HLA-B (1 mismatch)                       | .85       | .239 | 1.39  | 1 | 0.65 | 1.11 |
| HLA-B (2 mismatches)                     | 1.0 (ref) |      |       |   |      |      |
| HLA-Dr                                   |           | .020 | 7.87  | 2 |      |      |
| HLA-Dr (0 mismatches)                    | 1.05      | .859 | 0.03  | 1 | 0.64 | 1.71 |
| HLA-Dr (1 mismatch)                      | 1.41      | .152 | 2.05  | 1 | 0.88 | 2.24 |
| HLA-Dr (2 mismatches)                    | 1.0 (ref) |      |       |   |      |      |
| Donor hypotensive period (yes)           | 1.02      | .888 | 0.02  | 1 | 0.81 | 1.27 |
| Dialysis vintage (years)                 | 1.04      | .049 | 3.87  | 1 | 1.00 | 1.08 |
| Smoking (yes)                            | 1.12      | .292 | 1.11  | 1 | 0.91 | 1.37 |
| Terminal eGFR donor (MDRD)               | 1.00      | .100 | 2.71  | 1 | 1.00 | 1.00 |
| Recipient primary disease                |           | .242 | 7.95  | 6 |      |      |
| Polycystic kidney disease                | 1.0 (ref) |      |       |   |      |      |
| Glomerulonephritis                       | 1.23      | .239 | 1.39  | 1 | 0.87 | 1.72 |
| Renal vascular disease                   | .95       | .786 | 0.07  | 1 | 0.65 | 1.39 |
| Diabetes                                 | 1.13      | .564 | 0.33  | 1 | 0.74 | 1.72 |
| Chronic renal failure (etiology unknown) | 1.11      | .573 | 0.32  | 1 | 0.77 | 1.62 |
| Pyelonephritis                           | 1.63      | .025 | 5.05  | 1 | 1.06 | 2.50 |
| Other                                    | 1.06      | .772 | 0.08  | 1 | 0.71 | 1.59 |
| Intercept                                | .12       | .000 | 21.04 | 1 |      |      |

E: Mortality of elderly transplanted patients from start of dialysis treatment and waitlisted for first transplantation compared with waitlisted elderly patients remaining on dialysis treatment

Table

*Mortality of Dutch elderly patients on renal replacement therapy*

|                              | <b>Waiting time<br/>in years<br/>(IQR)</b> | <b>Patient death<br/>before Tx<br/>(IQR waiting<br/>time)</b> | <b>Patient<br/>death 5<br/>years<br/>after Tx</b> | <b>Total proportion<br/>of patient death<br/>(IQR waiting time)</b> |
|------------------------------|--------------------------------------------|---------------------------------------------------------------|---------------------------------------------------|---------------------------------------------------------------------|
| Tx Young(d)/Elderly(r) DBD   | 3.6 (2.2-5.5)                              | 18.5% (3.9-39.0)                                              | 31.3%                                             | 49.8% (35.2-70.3)                                                   |
| Tx Young(d)/Elderly(r) DCD   | 3.5 (2.4-5.1)                              | 16.3% (4.8-25.2)                                              | 31.4%                                             | 47.7% (36.2-56.6)                                                   |
| If maintained on dialysis    | 8.5 (7.3-10.4)                             |                                                               |                                                   | 63.0% (54.0-75.3)                                                   |
| Tx Elderly(d)/Elderly(r) DBD | 3.4 (2.5-4.6)                              | 15.4% (5.0-31.1)                                              | 45.0%                                             | 60.4% (50.0-76.1)                                                   |
| Elderly(d)/Elderly(r) DCD    | 3.1 (2.2-4.0)                              | 11.4% (3.9-21.7)                                              | 49.1%                                             | 60.5% (53.0-70.8)                                                   |
| If maintained on dialysis    | 8.3 (7.4-9.3)                              |                                                               |                                                   | 61.3% (58.1-68.3)                                                   |

\* Note. IQR = Inter Quartile Range. D = donor. R = recipient. Tx = first transplantation.
